# Supplementary material
Source: PubMed Central journal article supplement (PMC9790444)

**Supplementary Table 1.** *Post-mortem* details for the Lothian Birth Cohort 1936 participants.

CAA=cerebral amyloid angiopathy; COPD=chronic obstructive pulmonary disease; F=female; LVSD=left ventricular systolic dysfunction; M=male; PM=*post-mortem*; SVD=small vessel disease; WM=white matter.

| Brain bank number | Age at death | Sex | Interval between blood sample and death (years) | PM interval (hours) | Brain weight (g) | Brain pH | Cause of death                                                                                   | PM findings                                                                                                    |
|-------------------|--------------|-----|-------------------------------------------------|---------------------|------------------|----------|--------------------------------------------------------------------------------------------------|----------------------------------------------------------------------------------------------------------------|
| BBN_19686         | 77           | F   | 0.87                                            | 75                  | 1320             | 6.5      | ·None specified                                                                                  | ·SVD<br>·Cerebral and cerebellar microinfarcts (lacunar)<br>·CAA<br>·Braak stage I                             |
| 001.26495         | 78           | M   | 3.15                                            | 39                  | 1290             | 6.2      | ·Amyloidosis<br>·Multiple Myeloma<br>·COPD                                                       | ·Braak stage I                                                                                                 |
| 001.28402         | 79           | M   | 2.29                                            | 49                  | 1503             | 6.3      | ·Hospital acquired pneumonia<br>·Alcohol-related cirrhosis with ascites<br>·Severe LVSD<br>·COPD | ·Thal phase II<br>·Mild WM pathology<br>·Moderate non-amyloid SVD<br>·Hepatic encephalopathy<br>·Braak stage I |
| 001.28406         | 79           | M   | 4.02                                            | 72                  | 1437             | 6.1      | ·Suspected lung carcinoma<br>·Pneumonia                                                          | ·Thal phase II<br>·Moderate arteriolar CAA<br>·Braak stage II<br>·MildWM pathology<br>·Mild non-amyloid SVD    |
| 001.28793         | 79           | F   | 2.96                                            | 72                  | 1219             | 5.9      | None specified                                                                                   | ·Thal phase I<br>·Moderate WM pathology<br>·Moderate non-amyloid SVD<br>·Braak stage II                        |

|           |    |   |      |    |      |     |                                                                                                              |                                                                                                                                |
|-----------|----|---|------|----|------|-----|--------------------------------------------------------------------------------------------------------------|--------------------------------------------------------------------------------------------------------------------------------|
| 001.28794 | 79 | F | 3.29 | 72 | 1289 | 5.8 | ·Metastatic breast cancer                                                                                    | ·Mild WM pathology<br>·Mild non-amyloid SVD<br>·Braak stage I                                                                  |
| 001.28960 | 79 | M | 1.57 | 57 | 1301 | 6.1 | ·Chronic Lymphocytic Leukaemia<br>·Type 2 diabetes<br>·Myelofibrosis<br>·Idiopathic thrombocytopenia purpura | ·Moderate WM pathology<br>·Moderate non-amyloid SVD                                                                            |
| 001.29082 | 79 | F | 0.29 | 80 | 1339 | 5.9 | ·Metastatic carcinoma<br>·Squamous cell carcinoma lung                                                       | ·Thal amyloid phase V<br>·Mild arteriolar CAA<br>·Braak stage III<br>·Mild WM pathology<br>·Mild non-amyloid SVD               |
| 001.29086 | 80 | F | 0.84 | 68 | 1468 | 6.2 | ·Intracerebral haemorrhage<br>·Hypertension                                                                  | ·Cerebral haemorrhage<br>·Severe WM pathology<br>·Severe non-amyloid SVD                                                       |
| 001.31495 | 81 | M | 2.07 | 38 | 1318 | 5.8 | ·Stage IV Lung cancer<br>·Type 2 diabetes<br>·Ischaemic heart disease                                        | ·Alzheimer disease<br>·Thal phase IV<br>·Braak stage VI<br>·Mild non-amyloid SVD<br>·Mild arteriolar CAA<br>·Mild WM pathology |
| 001.32577 | 81 | M | 1.18 | 74 | 1313 | 6.1 | ·Metastatic lung cancer<br>·COPD                                                                             | ·Thal phase III<br>·Braak stage II<br>·Mild WM pathology<br>·Mild non-amyloid SVD<br>·WM microinfarcts<br>·Mild arteriolar CAA |

|           |    |   |      |    |      |     |                                                                                                                                         |                                                                                                                           |
|-----------|----|---|------|----|------|-----|-----------------------------------------------------------------------------------------------------------------------------------------|---------------------------------------------------------------------------------------------------------------------------|
| 001.34131 | 82 | M | 2.61 | 95 | 1472 | 5.9 | ·Squamous cell carcinoma of the lung                                                                                                    | ·Thal amyloid phase III<br>·Severe arteriolar CAA<br>·Braak stage IV<br>·Severe WM pathology<br>·Moderate non-amyloid SVD |
| 001.35181 | 82 | M | 2.92 | 49 | 1496 | 6.1 | ·Bronchopneumonia<br>·Malignant neoplasm of the lung<br>·Acute renal failure<br>·Vascular dementia<br>·Ischaemic heart disease          | ·Thal phase II<br>·Braak stage II<br>·Mild arteriolar CAA<br>·Mild WM pathology<br>·Mild non-amyloid SVD                  |
| 001.35215 | 82 | M | 6.05 | 40 | 1246 | 6   | ·Bronchopneumonia<br>·Left ventricular systolic dysfunction<br>·Hypertension<br>·Parotid abscess<br>·Prostate cancer<br>·Osteoarthritis | ·Braak stage I<br>·Severe WM pathology<br>·Severe non-amyloid SVD                                                         |

**Supplementary Table 2.** The DNAm CRP score probes and their coefficients. The CpG highlighted in bold was not available on the EPIC array and was omitted from analyses.

| <i>CpG</i>        | <i>coef</i> |
|-------------------|-------------|
| <b>cg06126421</b> | -0.0052     |
| cg06690548        | -0.0048     |
| cg10636246        | -0.0069     |
| cg18181703        | -0.0053     |
| cg19821297        | -0.0051     |
| cg25325512        | -0.0031     |
| cg27023597        | -0.005      |

**Supplementary Table 3.** The DNAm IL-6 score probes and their coefficients. CpGs highlighted in bold were not in the original DNAm IL-6 score (derived from LBC1936 data inclusive of those who had donated *post-mortem* brain tissue: see methods section).

| <i>CpG</i>        | <i>coef</i> |
|-------------------|-------------|
| <b>cg07005055</b> | 0.0011      |
| cg26144437        | 0.0060      |
| cg03076319        | 0.015       |
| <b>cg11231069</b> | 0.0034      |
| cg05575921        | -0.011      |
| <b>cg08703857</b> | 0.0034      |
| cg21368161        | 0.0087      |
| cg04642923        | 0.0088      |
| cg21123519        | 0.0012      |
| cg04583842        | 0.0051      |
| cg24455236        | 0.0042      |
| cg25323809        | 0.00018     |
| cg03885055        | -0.018      |
| cg17412005        | -0.0049     |
| cg19638572        | 0.024       |
| cg14965639        | -0.017      |
| <b>cg14230378</b> | 0.0088      |
| cg20789595        | -0.023      |
| cg26230601        | -0.0038     |
| cg16508480        | 0.0034      |
| <b>cg17501210</b> | -0.0029     |
| cg12503394        | 0.00065     |
| cg18925601        | -0.0044     |
| cg19584649        | 0.0057      |
| <b>cg22411165</b> | -0.00026    |
| cg04366687        | 0.0071      |
| cg25250132        | 0.017       |
| cg04468741        | 0.0017      |
| cg23729763        | 0.015       |
| cg10195814        | 0.00060     |
| cg03998636        | -0.00071    |
| cg20059928        | -0.013      |
| cg04928129        | -0.0062     |
| cg12929678        | 0.032       |

**Supplementary Table 4.** The differences in the DNAm CRP and IL-6 scores over the brain regions.

BA17 was used as the reference. Associations with  $P < 0.05$  are highlighted in bold.

DNAm=DNA methylation; CRP=C-reactive protein; IL-6=interleukin-6; BA=Brodman area.

|                        | $\beta$ | SE   | P            |
|------------------------|---------|------|--------------|
| <i>DNAm CRP score</i>  |         |      |              |
| BA20/21                | -0.14   | 0.32 | 0.65         |
| BA24                   | -0.42   | 0.33 | 0.21         |
| BA46                   | -0.35   | 0.29 | 0.23         |
| Hippocampus            | 0.34    | 0.31 | 0.27         |
| <i>DNAm IL-6 score</i> |         |      |              |
| BA20/21                | -0.29   | 0.19 | 0.13         |
| BA24                   | 0.46    | 0.20 | <b>0.024</b> |
| BA46                   | -0.076  | 0.17 | 0.66         |
| Hippocampus            | -0.25   | 0.18 | 0.18         |

**Supplementary Table 5.** The differences in the DNAm age acceleration measures over the brain regions.

BA17 was used as the reference. Associations with  $P < 0.05$  are highlighted in bold.

IEAA=intrinsic epigenetic age acceleration; EEAA=extrinsic epigenetic age acceleration; BA= Brodmann area.

|                                    | $\beta$              | SE   | P                          |
|------------------------------------|----------------------|------|----------------------------|
| <i>AgeAccel<sub>Cortical</sub></i> |                      |      |                            |
| BA20/21                            | 0.21                 | 0.20 | 0.29                       |
| BA24                               | 0.14                 | 0.21 | 0.52                       |
| BA46                               | 0.44                 | 0.18 | <b>0.022</b>               |
| Hippocampus                        | 0.90                 | 0.19 | <b>2.6x10<sup>-5</sup></b> |
| <i>AgeAccel<sub>Grim</sub></i>     |                      |      |                            |
| BA20/21                            | -0.56                | 0.29 | 0.055                      |
| BA24                               | 0.52                 | 0.29 | 0.085                      |
| BA46                               | -0.46                | 0.26 | 0.090                      |
| Hippocampus                        | 0.46                 | 0.28 | 0.10                       |
| <i>AgeAccel<sub>Pheno</sub></i>    |                      |      |                            |
| BA20/21                            | 0.34                 | 0.28 | 0.23                       |
| BA24                               | 0.065                | 0.29 | 0.83                       |
| BA46                               | 5.5x10 <sup>-3</sup> | 0.26 | 0.98                       |
| Hippocampus                        | 1.14                 | 0.27 | <b>1.1x10<sup>-4</sup></b> |
| <i>IEAA</i>                        |                      |      |                            |
| BA20/21                            | 0.60                 | 0.35 | 0.091                      |
| BA24                               | 0.10                 | 0.37 | 0.78                       |
| BA46                               | 0.63                 | 0.32 | 0.057                      |
| Hippocampus                        | 0.83                 | 0.34 | <b>0.018</b>               |
| <i>EEAA</i>                        |                      |      |                            |
| BA20/21                            | 0.25                 | 0.25 | 0.32                       |
| BA24                               | 0.15                 | 0.26 | 0.57                       |
| BA46                               | 0.31                 | 0.28 | 0.18                       |
| Hippocampus                        | 0.99                 | 0.24 | <b>1.3x10<sup>-4</sup></b> |

**Supplementary Table 6.** Associations between DNAm age acceleration and inflammation scores in the blood and the brain and CD68<sup>+</sup> microglial burdens.

The blood variables refer to the last measurement available prior to death. The brain variables refer to the mean across all five regions. Associations with P<0.05 are highlighted in bold.

CRP=C-reactive protein, DNAm: DNA methylation; IEAA=intrinsic epigenetic age acceleration; EEAA=extrinsic epigenetic age acceleration; IL-6=interleukin-6

|                              | $\beta$ | SE   | P            |
|------------------------------|---------|------|--------------|
| <i>Brain</i>                 |         |      |              |
| DNAm CRP score               | 0.05    | 0.12 | 0.66         |
| DNAm IL-6 score              | 0.02    | 0.13 | 0.89         |
| AgeAccel <sub>Cortical</sub> | 0.17    | 0.16 | 0.29         |
| AgeAccel <sub>Grim</sub>     | 0.16    | 0.13 | 0.21         |
| AgeAccel <sub>Pheno</sub>    | 0.40    | 0.12 | <b>0.002</b> |
| IEAA                         | 0.18    | 0.13 | 0.18         |
| EEAA                         | 0.06    | 0.14 | 0.68         |
| <i>Blood</i>                 |         |      |              |
| DNAm CRP score               | -0.28   | 0.18 | 0.16         |
| DNA IL-6 score               | 0.32    | 0.17 | 0.10         |
| AgeAccel <sub>Grim</sub>     | 0.25    | 0.26 | 0.36         |
| AgeAccel <sub>Pheno</sub>    | -0.17   | 0.21 | 0.45         |
| IEAA                         | -0.21   | 0.26 | 0.43         |
| EEAA                         | -0.25   | 0.19 | 0.21         |



**Supplementary Figure 1.** Spearman correlations between the last blood DNAm CRP score and the DNAm CRP score in each of the five brain regions assessed. The correlation coefficients and 95% confidence intervals are presented in the table.

The age at last blood measurement ranged from 75.5 to 80.2 years and the age at death ranged from 77.6 to 82.9 years.

BA=Brodmann area; DNAm=DNA methylation; CRP=C-reactive protein

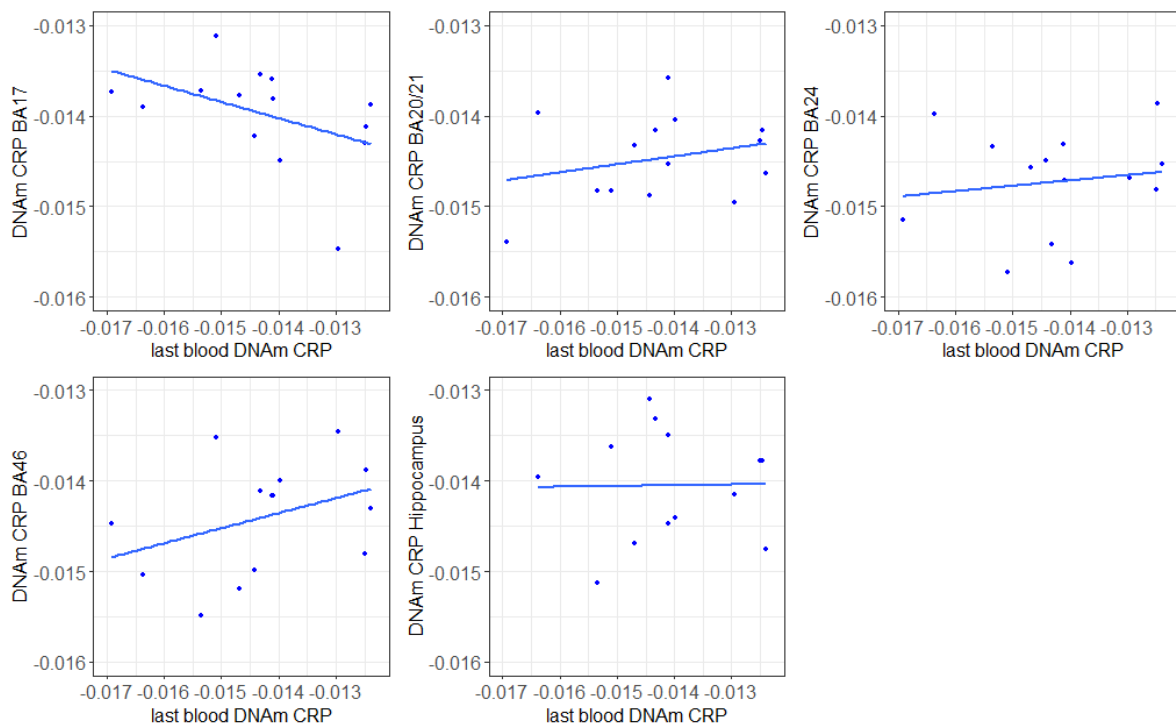

| Region      | r     | 95% confidence interval |
|-------------|-------|-------------------------|
| BA17        | -0.52 | -0.79, 0.10             |
| BA20/21     | 0.20  | -0.31, 0.70             |
| BA24        | 0.07  | -0.42, 0.63             |
| BA46        | 0.46  | -0.20, 0.75             |
| Hippocampus | -0.07 | -0.54, 0.56             |

**Supplementary Figure 2.** Spearman correlations between the last blood DNAm IL-6 score and the DNAm IL-6 score in each of the five brain regions assessed. The correlation coefficients and 95% confidence intervals are presented in the table.

The age at last blood measurement ranged from 75.5 to 80.2 years and the age at death ranged from 77.6 to 82.9 years.

BA= Brodmann area; DNAm=DNA methylation; IL-6=interleukin-6

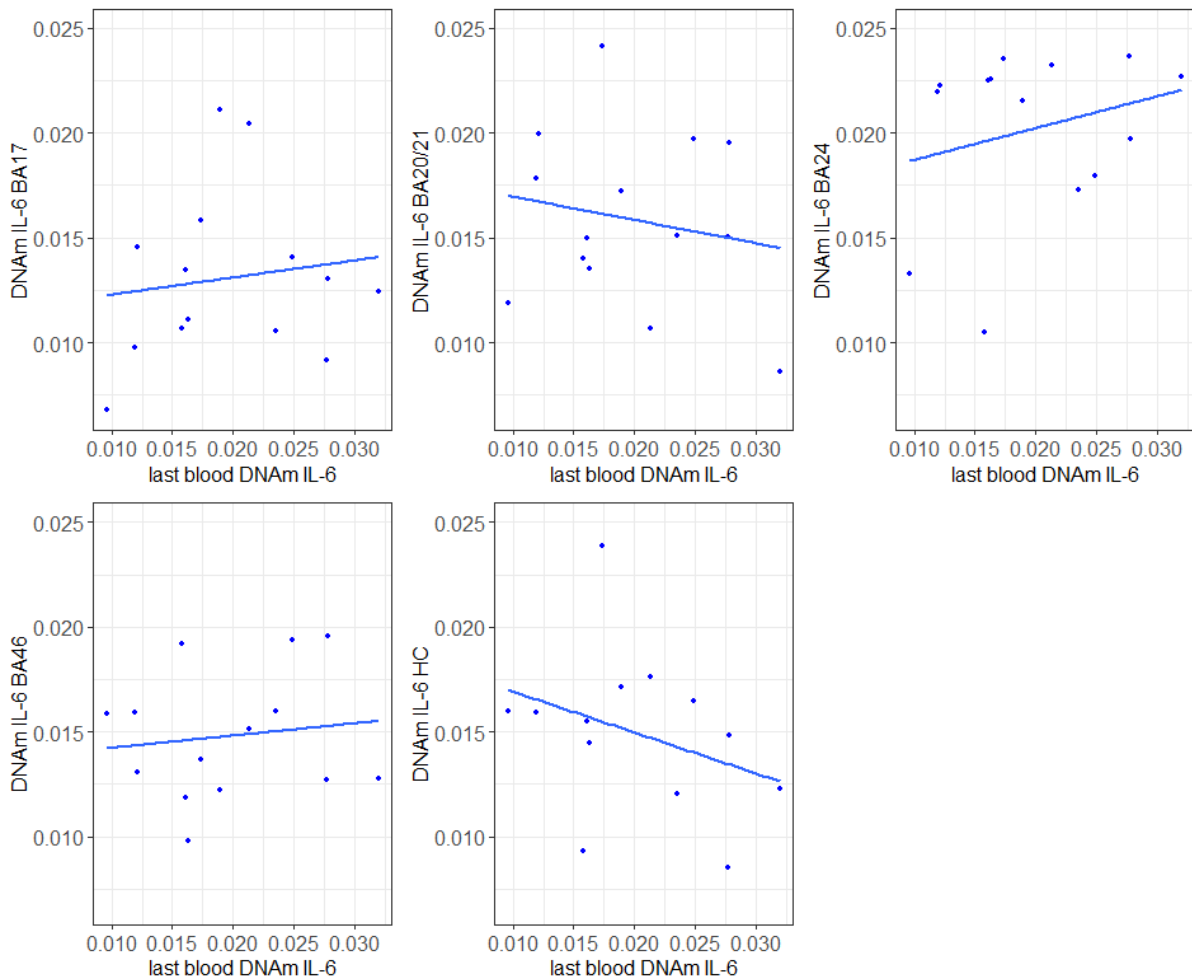

| Region      | r     | 95% confidence interval |
|-------------|-------|-------------------------|
| BA17        | 0.14  | -0.43, 0.62             |
| BA20/21     | -0.18 | -0.65, 0.39             |
| BA24        | 0.25  | -0.32, 0.69             |
| BA46        | 0.13  | -0.43, 0.62             |
| Hippocampus | -0.33 | -0.75, 0.27             |

**Supplementary Figure 3.** Spearman correlations between the last blood IEAA and IEAA in each of the five brain regions assessed. The correlation coefficients and 95% confidence intervals are presented in the table.

The age at last blood measurement ranged from 75.5 to 80.2 years and the age at death ranged from 77.6 to 82.9 years.

BA= Brodmann area; IEAA=intrinsic epigenetic age acceleration

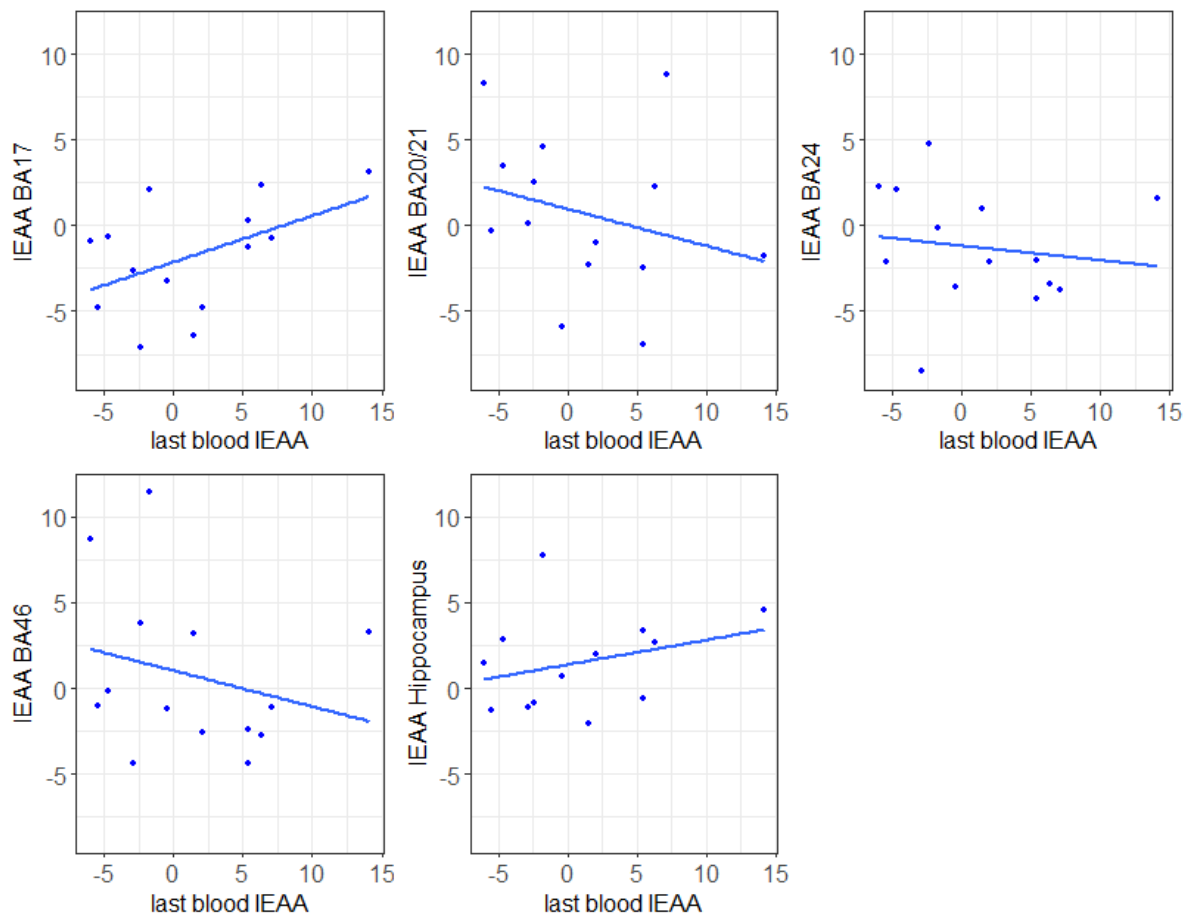

| Region      | r     | 95% confidence interval |
|-------------|-------|-------------------------|
| BA17        | 0.49  | -0.058, 0.81            |
| BA20/21     | -0.27 | -0.69, 0.31             |
| BA24        | -0.14 | -0.63, 0.42             |
| BA46        | -0.25 | -0.69, 0.32             |
| Hippocampus | 0.30  | -0.30, 0.73             |

**Supplementary Figure 4.** Spearman correlations between the last blood EEAA and EEAA in each of the five brain regions assessed. The correlation coefficients and 95% confidence intervals are presented in the table.

The age at last blood measurement ranged from 75.5 to 80.2 years and the age at death ranged from 77.6 to 82.9 years.

BA= Brodmann area; EEAA=extrinsic epigenetic age acceleration

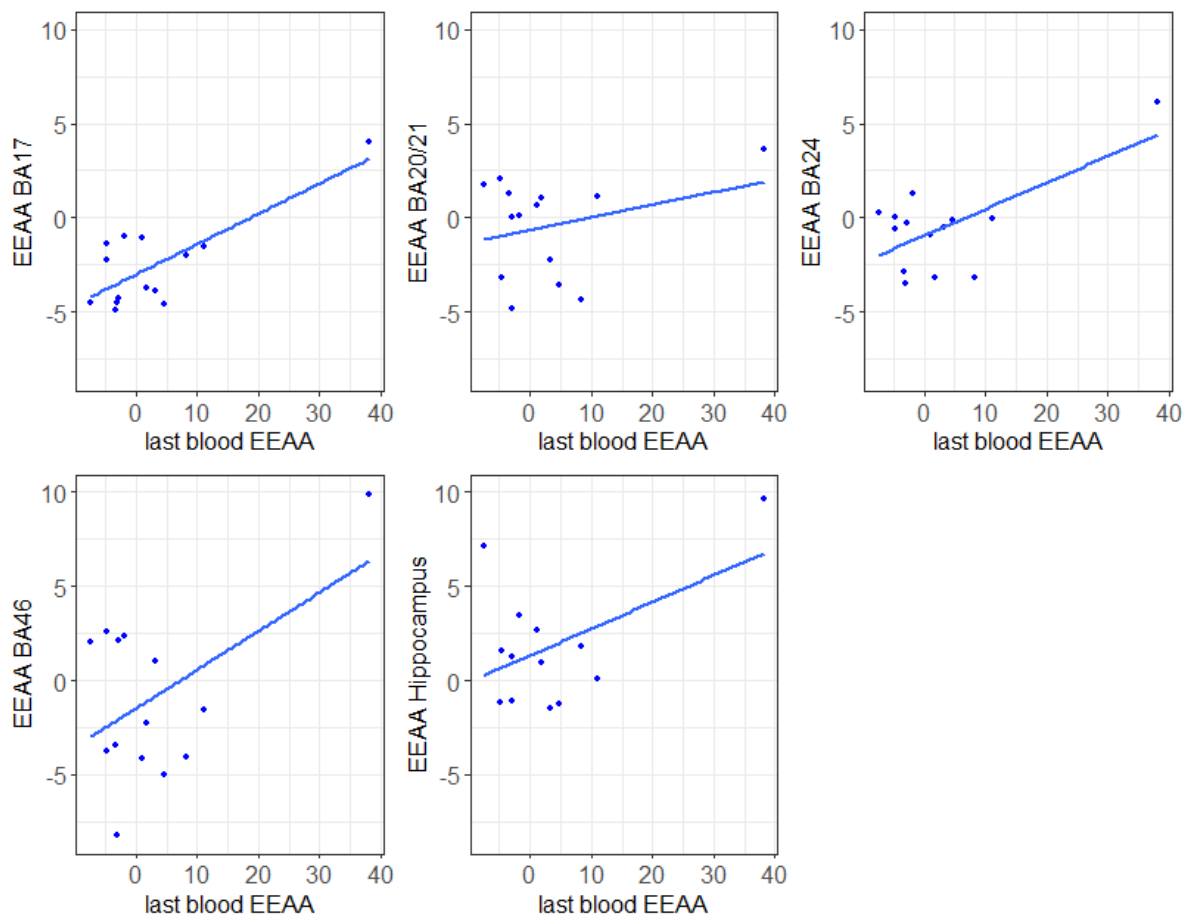

| Region      | r    | 95% confidence interval |
|-------------|------|-------------------------|
| BA17        | 0.78 | 0.42, 0.93              |
| BA20/21     | 0.29 | -0.29, 0.71             |
| BA24        | 0.66 | 0.20, 0.88              |
| BA46        | 0.52 | 0.019, 0.82             |
| Hippocampus | 0.50 | -0.069, 0.82            |

**Supplementary Figure 5.** Spearman correlations between the last blood AgeAccelGrim and AgeAccelGrim in each of the five brain regions assessed. The correlation coefficients and 95% confidence intervals are presented in the table.

The age at last blood measurement ranged from 75.5 to 80.2 years and the age at death ranged from 77.6 to 82.9 years.

BA=Brodmann area

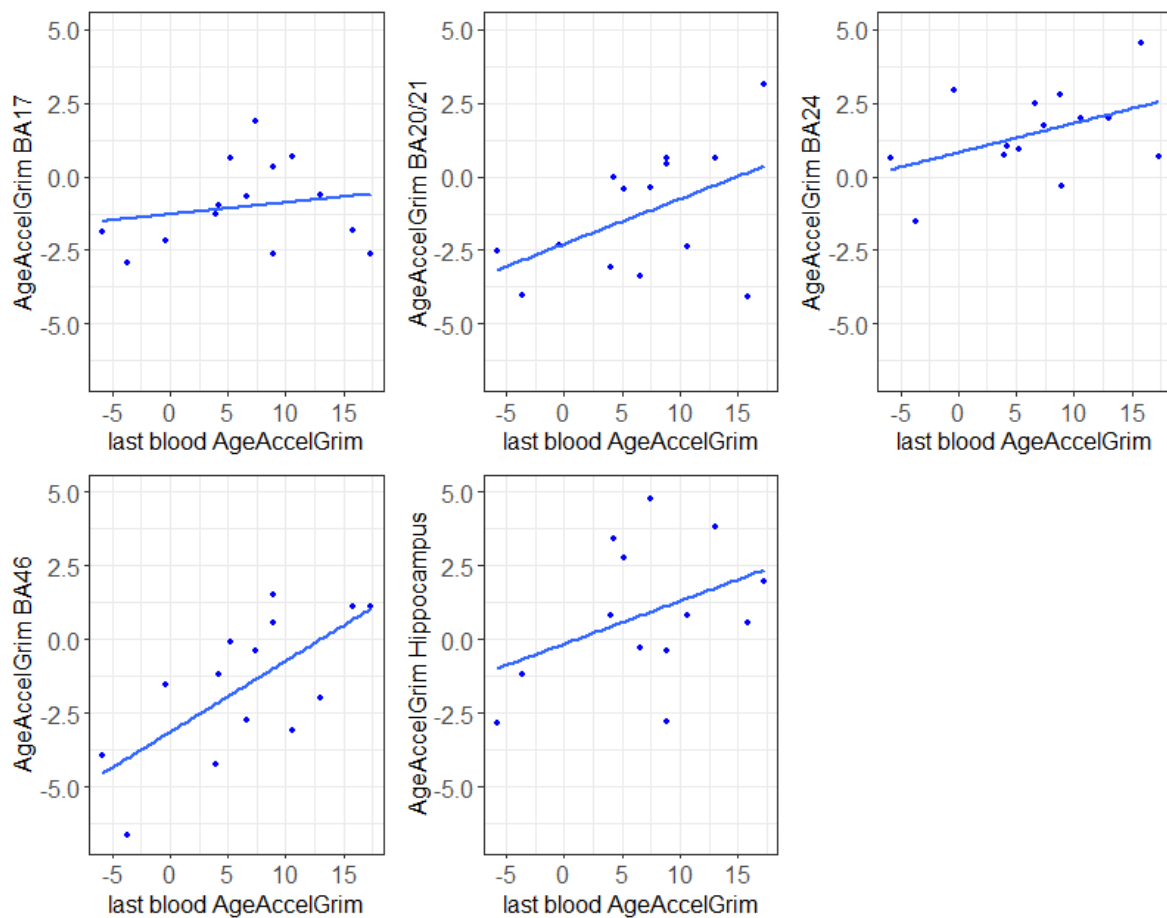

| Region      | r    | 95% confidence interval |
|-------------|------|-------------------------|
| BA17        | 0.18 | -0.39, 0.65             |
| BA20/21     | 0.48 | -0.069, 0.81            |
| BA24        | 0.44 | -0.11, 0.79             |
| BA46        | 0.68 | 0.23, 0.89              |
| Hippocampus | 0.40 | -0.19, 0.78             |

**Supplementary Figure 6.** Spearman correlations between the last blood AgeAccelPheno and AgeAccelPheno in each of the five brain regions assessed. The correlation coefficients and 95% confidence intervals are presented in the table.

The age at last blood measurement ranged from 75.5 to 80.2 years and the age at death ranged from 77.6 to 82.9 years.

BA=Brodmann area

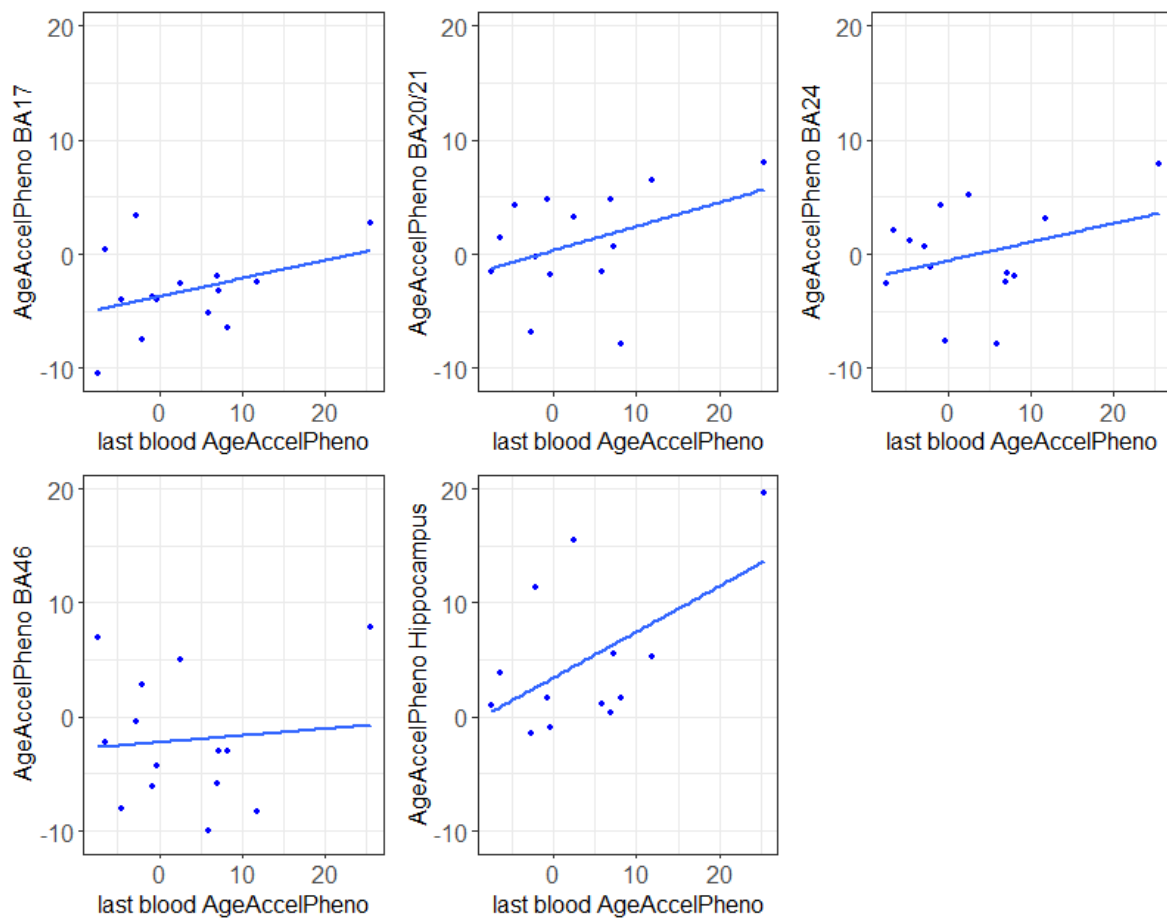

| Region      | r    | 95% confidence interval |
|-------------|------|-------------------------|
| BA17        | 0.37 | -0.20, 0.75             |
| BA20/21     | 0.39 | -0.18, 0.76             |
| BA24        | 0.32 | -0.26, 0.73             |
| BA46        | 0.09 | -0.46, 0.59             |
| Hippocampus | 0.54 | -0.021, 0.84            |

**Supplementary Figure 7.** Spearman correlations between the epigenetic age acceleration measures and DNAm inflammatory measures within the blood.

CRP=C-reactive protein; IL-6=interleukin-6; IEAA=intrinsic epigenetic age acceleration; EEAA=extrinsic epigenetic age acceleration

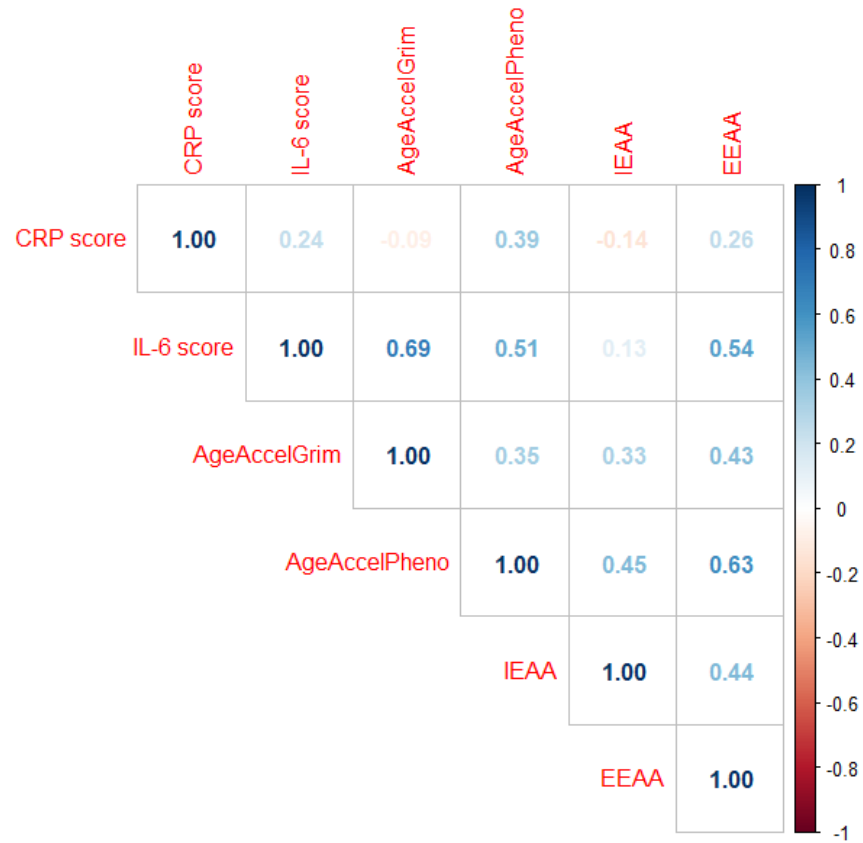

**Supplementary Figure 8.** Spearman correlations between the epigenetic age acceleration measures and DNAm inflammatory measures within the brain (mean across all five regions).

CRP=C-reactive protein; IL-6=interleukin-6; IEAA=intrinsic epigenetic age acceleration; EEAA=extrinsic epigenetic age acceleration

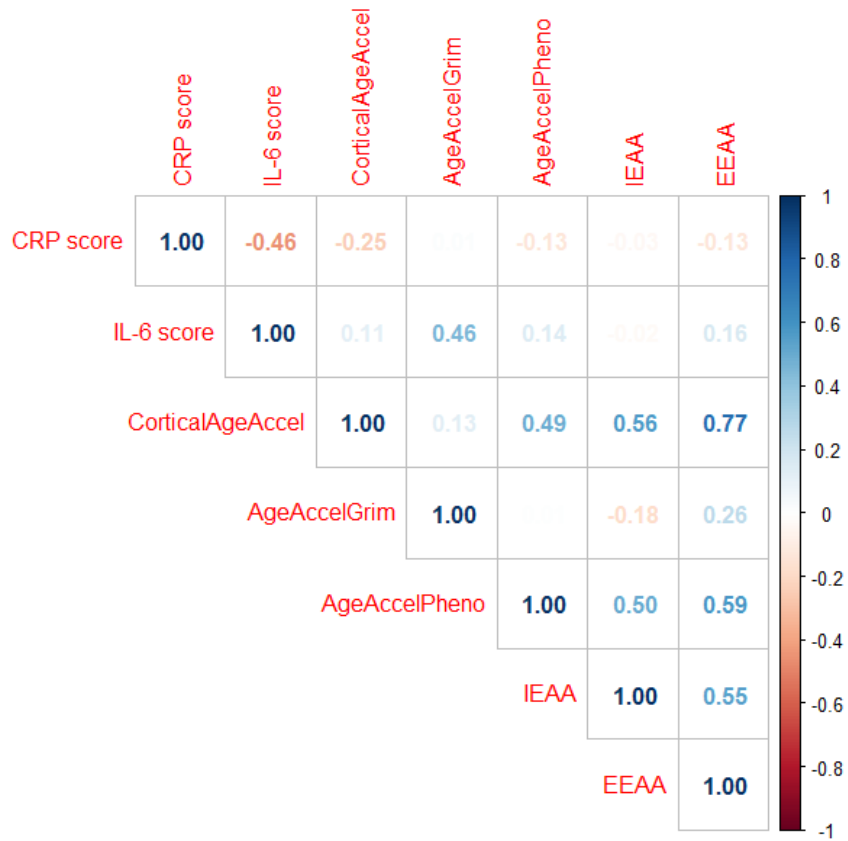



**Supplementary Figure 9.** Exemplar images of the staining in each of the brain regions analysed. Scale bar=150µm.

BA=Brodmann Area; HC=hippocampus.

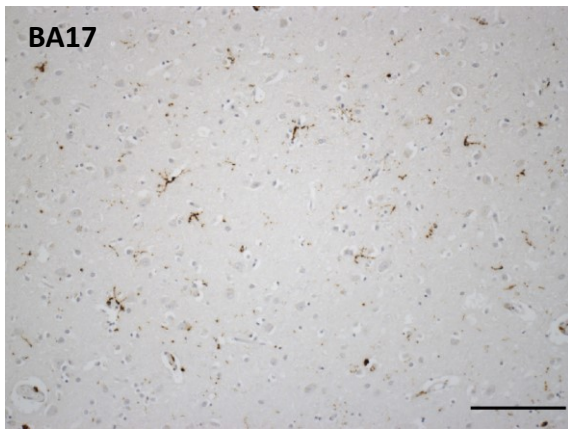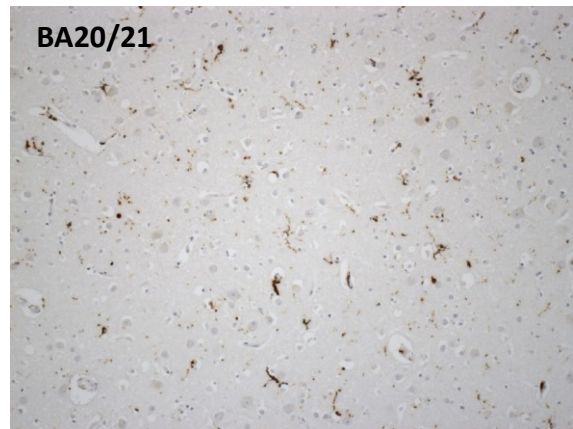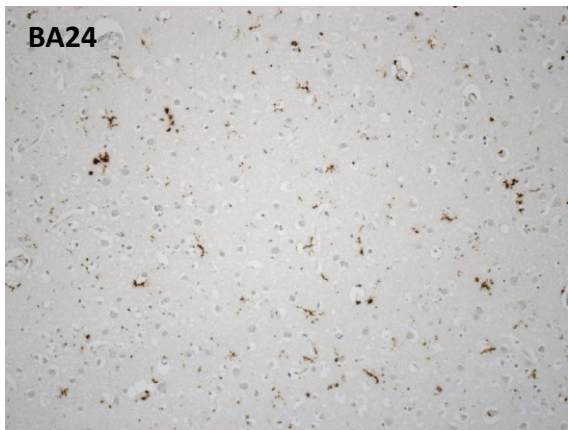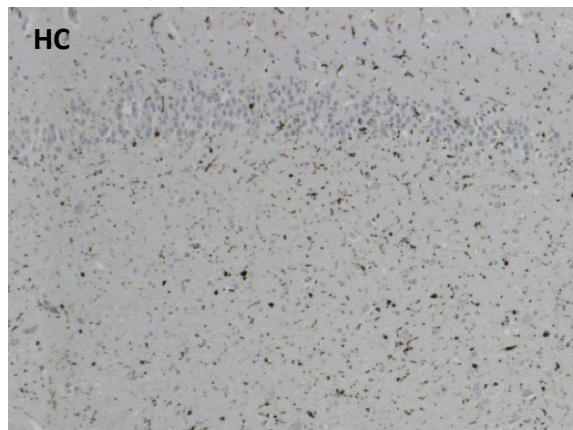

Supplement: EJN-56-5637-s001.pdf [file EJN-56-5637-s001.pdf]
